# Supplementary material
Source: PubMed Central journal article supplement (PMC2645826)

## Spectral tuning of the *Drosophila* Rh6 visual pigment

**Supplemental Figure 1. Molecular model of *Drosophila* Rh1 wildtype.** Model of *Drosophila* Rh1 wildtype pigment showing all residues within 3.2 Å of the lysine bound Schiff-base chromophore. Binding site residues are shown for the pigment after 2ns simulation. The 3-hydroxy-11-cis-retinal chromophore is shown in red with the Schiff base nitrogen in dark blue and the 3-hydroxyl oxygen in green. The  $\alpha$  carbons are shown in black. Hydrogen atoms are omitted except on water molecules, which are shown in light purple. Wild-type and mutated residues (315) are colored cyan. Sequence numbering based on P06002 (19).

**Supplemental Figure 2. Molecular model of *Drosophila* Rh1A315S mutant pigment.** Model of *Drosophila* Rh1A315S mutant pigment. Details for the figure are as noted in the legend for Supplemental Figure 1.

**Supplemental Figure 3. Molecular model of *Drosophila* Rh1A315C mutant pigment.** Model of *Drosophila* Rh1A315C mutant pigment. Details for the figure are as noted in the legend for Supplemental Figure 1.

**Supplemental Figure 4. Molecular structure of squid rhodopsin.** Structure of squid rhodopsin showing all residues within 3.2 Å of the lysine bound Schiff-base chromophore. The 11-cis-retinal chromophore is shown in red with the Schiff base nitrogen in dark blue. The  $\alpha$  carbons are shown in black. Hydrogen atoms are omitted. Squid rhodopsin residue V301 corresponds to *Drosophila* Rh1 A315. Sequence numbering based on X70498 (47). The structure is from PDB entry 2z73 (33).

Spectral tuning of the *Drosophila* Rh6 visual pigment.  
Supplemental Figure 1

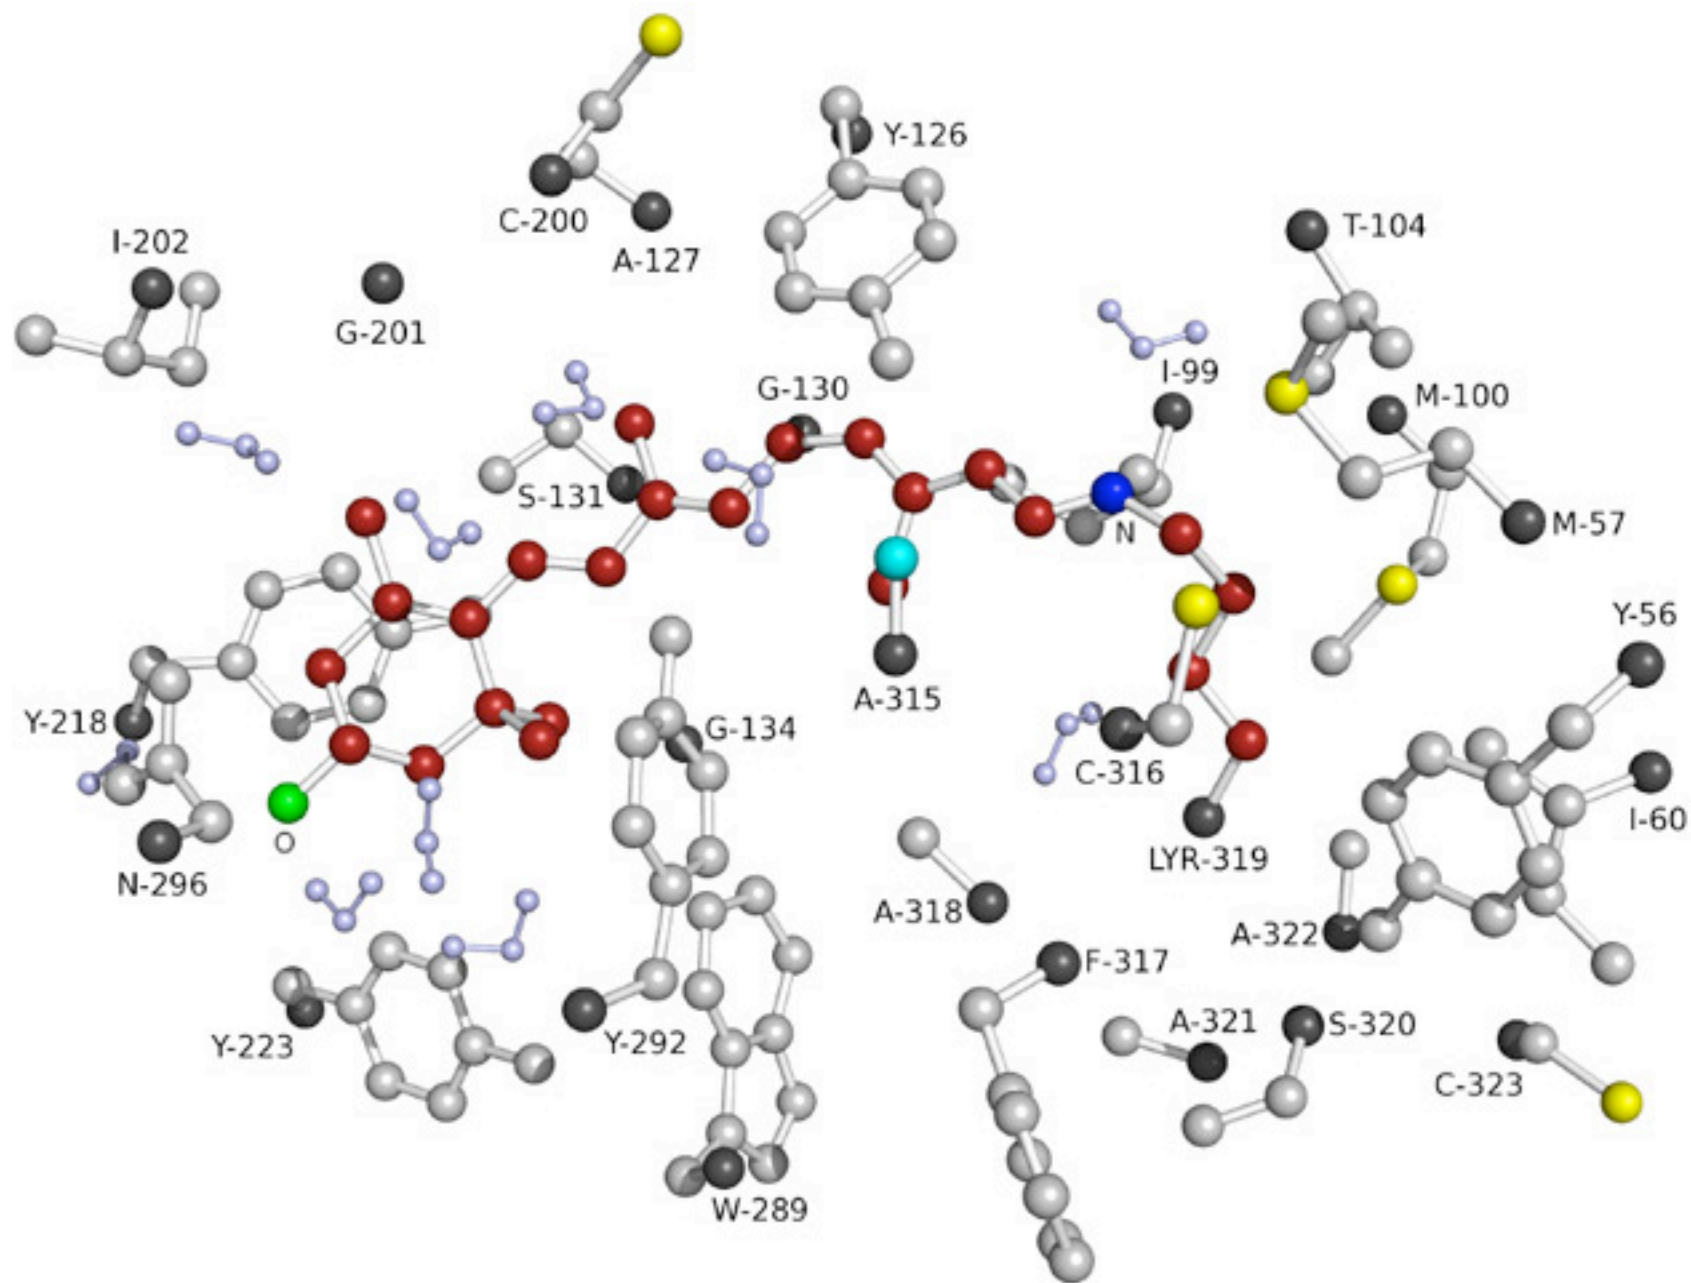

Spectral tuning of the *Drosophila* Rh6 visual pigment.  
Supplemental Figure 2

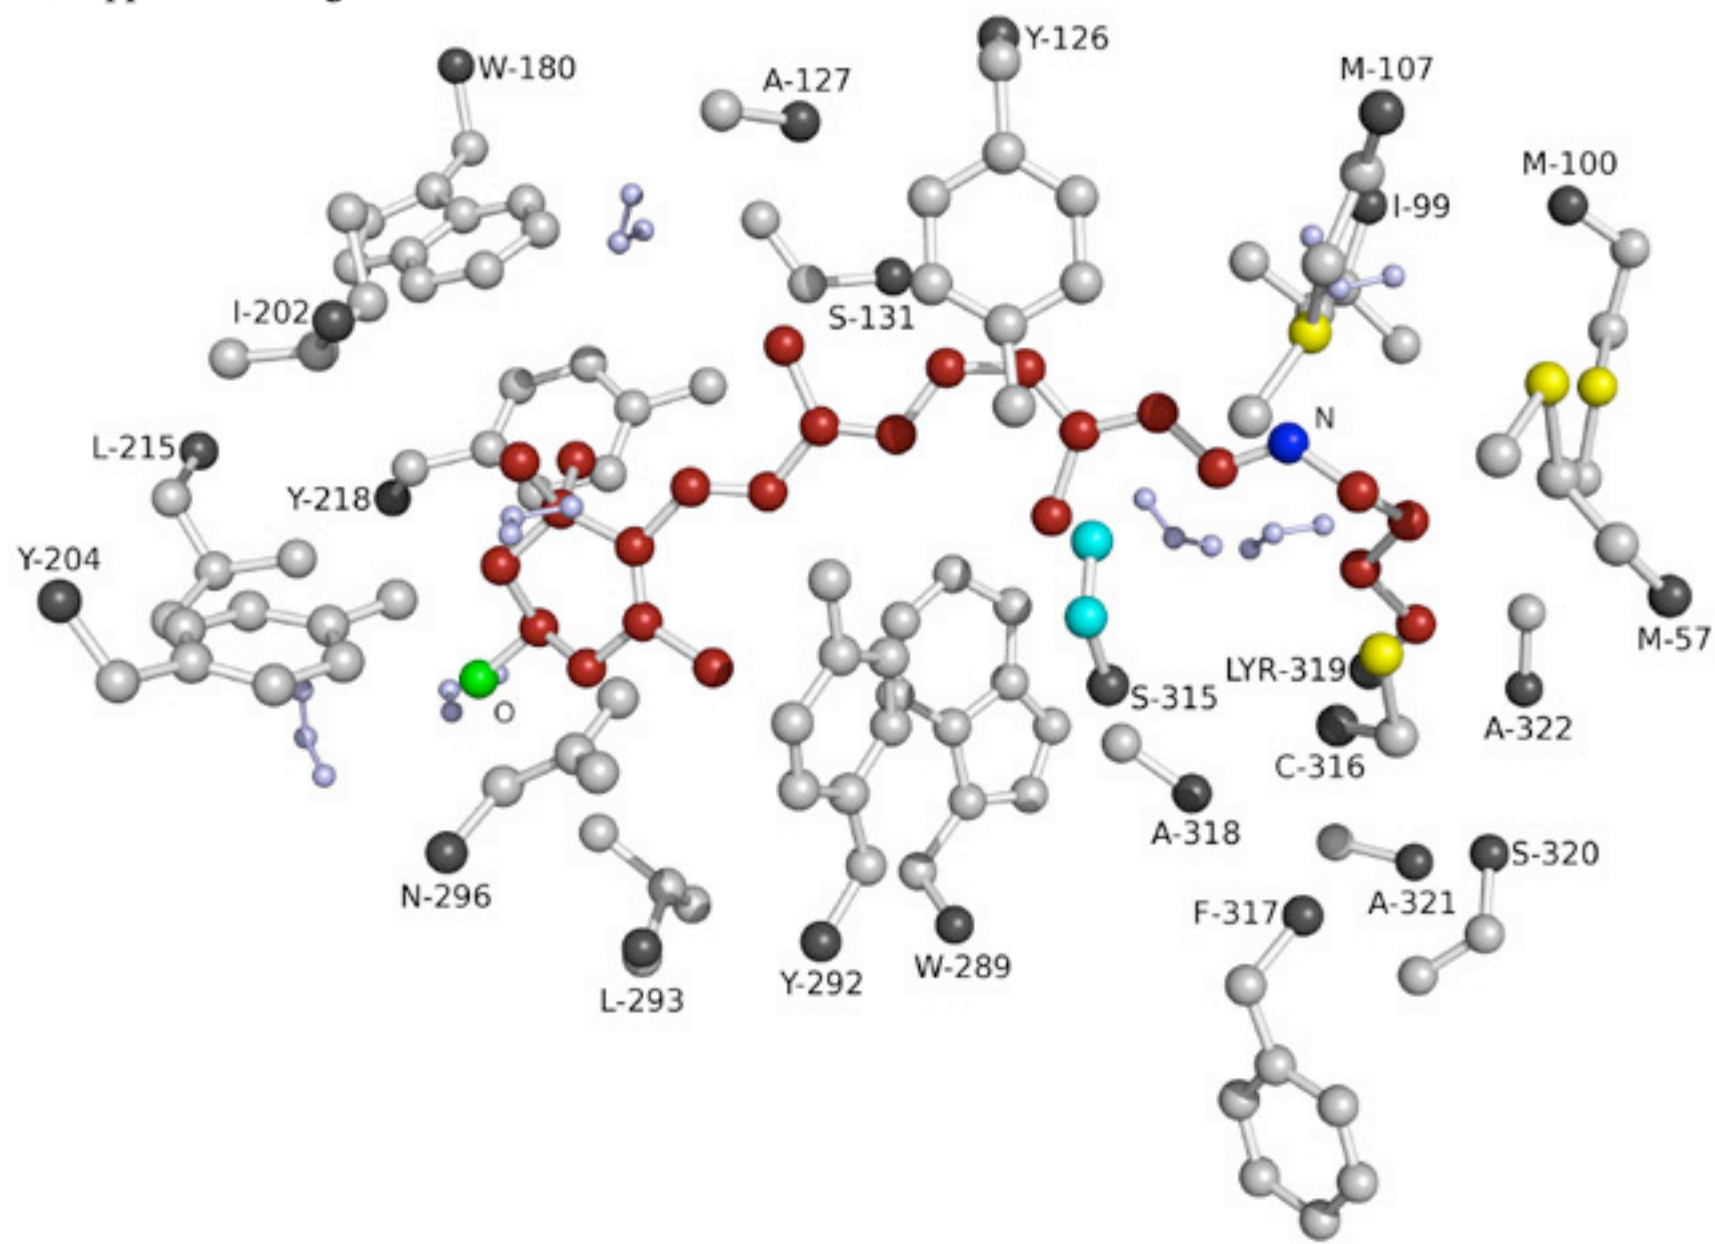

Spectral tuning of the *Drosophila* Rh6 visual pigment.  
Supplemental Figure 3

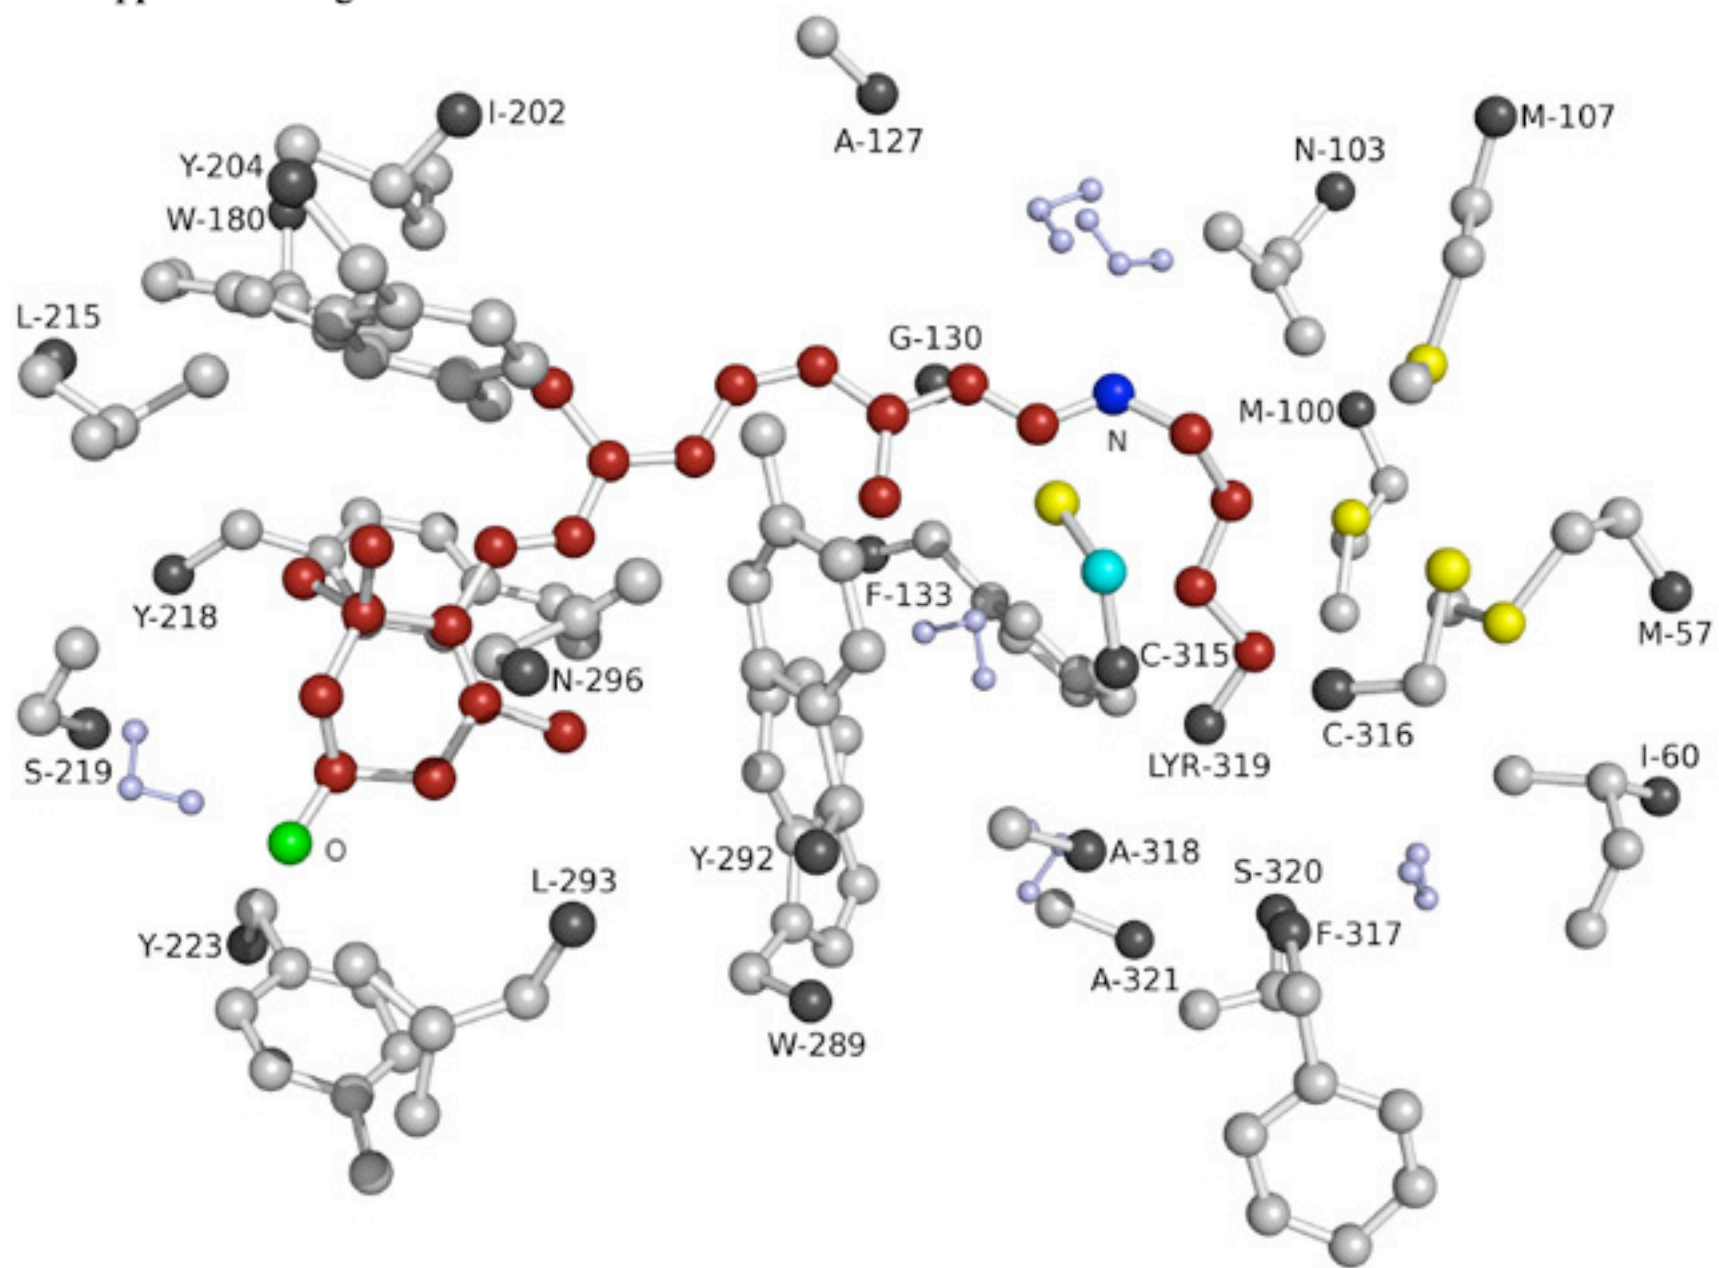

Spectral tuning of the *Drosophila* Rh6 visual pigment.  
Supplemental Figure 4

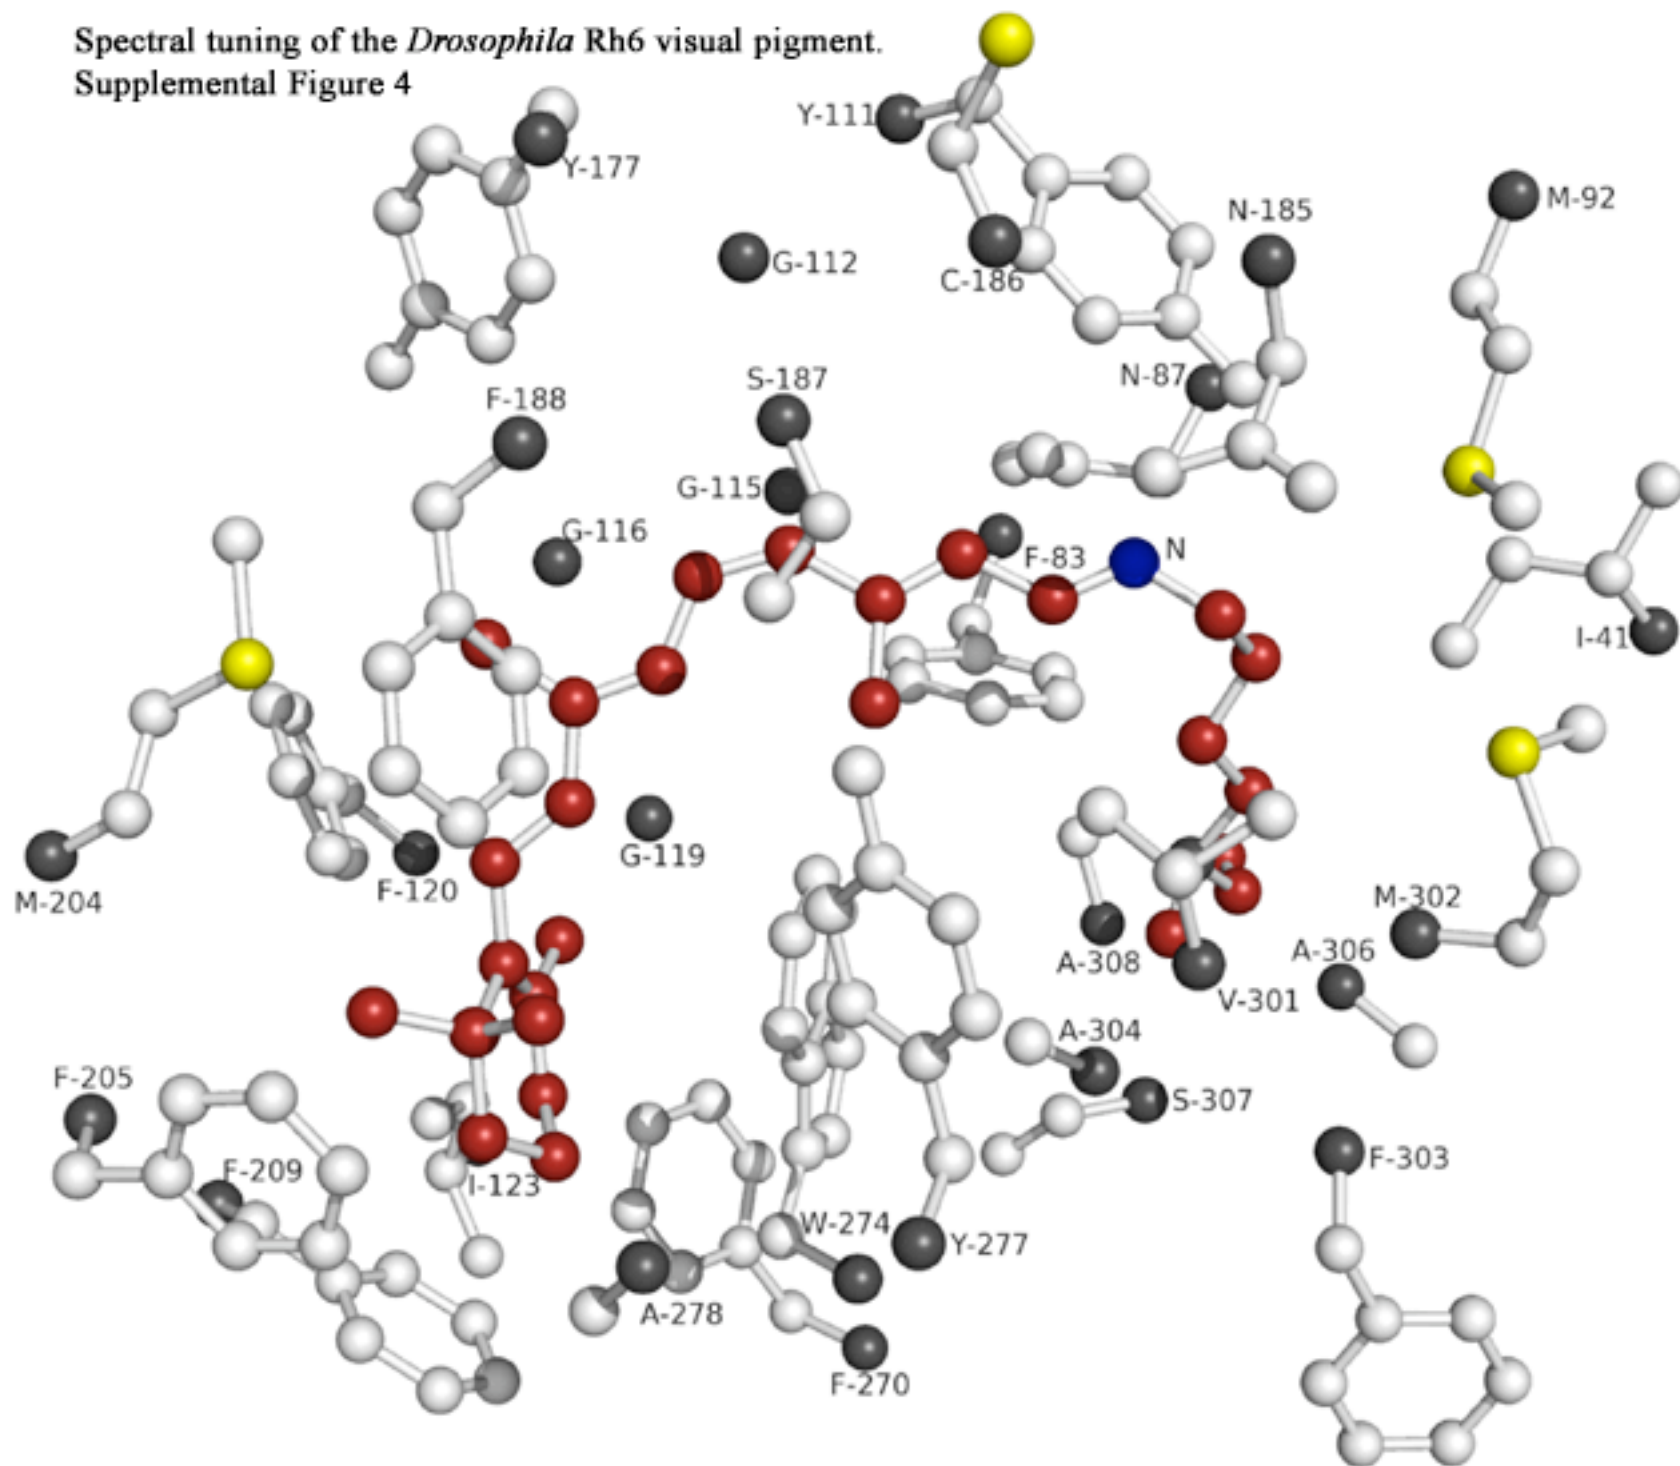

Supplement: M807368200_1.pdf [file M807368200_1.pdf]
